# Supplementary material
Source: PubMed Central journal article supplement (PMC3685287)

## Updated survival analysis of a randomized phase III study of subcutaneous versus intravenous bortezomib in patients with relapsed multiple myeloma

Bertrand Arnulf,<sup>1</sup> Halyna Pylypenko,<sup>2</sup> Sebastian Grosicki,<sup>3</sup> Ievgenii Karamanesht,<sup>4</sup> Xavier Leleu,<sup>5</sup> Helgi van de Velde,<sup>6</sup> Huaibao Feng,<sup>7</sup> Andrew Cakana,<sup>8</sup> William Deraedt,<sup>6</sup> and Philippe Moreau<sup>9</sup>

<sup>1</sup>Immuno-Hématologie Department, Hôpital Saint-Louis/Centre d'Investigations Cliniques, Hôpital Saint-Louis, Assistance Publique-Hôpitaux de Paris, France; <sup>2</sup>Cherkassy Regional Oncology Dispensary, Cherkassy, Ukraine; <sup>3</sup>Oddzial Hematologiczny ZSM, Chorzow, Poland; <sup>4</sup>Kiev BMT Center, Ukraine; <sup>5</sup>Hopital Huriez, CHRU, Lille, France; <sup>6</sup>Janssen Research & Development, Beerse, Belgium; <sup>7</sup>Janssen Research & Development, Raritan, NJ, USA; <sup>8</sup>Janssen Research & Development, High Wycombe, Buckinghamshire, UK; and <sup>9</sup>University Hospital, Nantes, France

Citation: Arnulf B, Pylypenko H, Grosicki S, Karamanesht I, Leleu X, van de Velde H, Feng H, Cakana A, Deraedt W, and Moreau P. Updated survival analysis of a randomized phase III study of subcutaneous versus intravenous bortezomib in patients with relapsed multiple myeloma. *Haematologica* 2012; 97(12):1925-1928. doi:10.3324/haematol.2012.067793

Online Supplementary Figure S1. Updated CONSORT diagram of patient disposition and flow through study protocol.

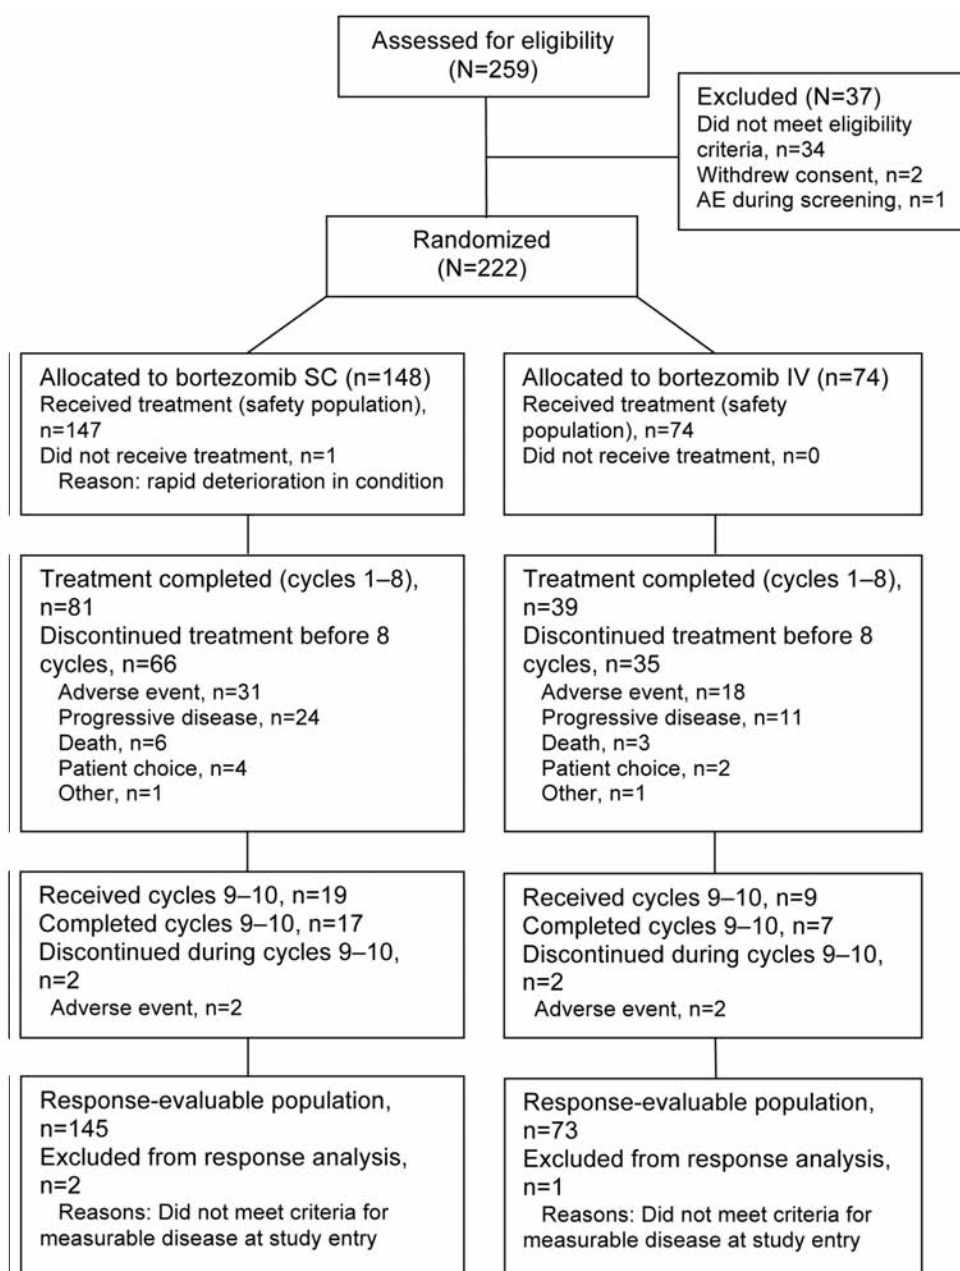

Supplement: supp_2012.067793_2012.067793.ARNULF_SUPPL.pdf [file supp_2012.067793_2012.067793.ARNULF_SUPPL.pdf]
